# Supplementary material
Source: PubMed Central journal article supplement (PMC6210220)
Supplement: 138080_1_supp_165160_pbgwm4.pdf [file 138080_1_supp_165160_pbgwm4.pdf]

**Supplemental Table 1.** Summary of Mass Spectrometry Method Parameters for Different Sets of Acquired Proteome Profiling Data .

|                      | TMT HeLa/3T3 Mixture | Label-Free HeLa and 3T3 Profiling | Label-Free WHIM-PDX Profiling | Label-Free BCM-PDX 1-hour QC Runs                                                              |                 |
|----------------------|----------------------|-----------------------------------|-------------------------------|------------------------------------------------------------------------------------------------|-----------------|
| Figure #             | 3                    | 1&4                               | 2&5                           | 4                                                                                              |                 |
| sRP Method           | 18F6R                | 15F5R                             | 9F6R                          | no off-line fractionation                                                                      |                 |
| HPLC                 | Instrument           | Ultimate3000                      | Ultimate3000                  | Ultimate3000                                                                                   | EASY-nLC1200    |
|                      | Pre-column           | 2cm 100umID C18                   | 2cm 100umID C18               | 2cm 100umID C18                                                                                | 2cm 100umID C18 |
|                      | Column               | 10cm 100umID C18                  | 10cm 100umID C18              | 10cm 100umID C18                                                                               | 5cm 150umID C18 |
|                      | Loading              | 10 min @ 2%B                      | 10 min @ 2%B                  | 10 min @ 2%B                                                                                   | Auto            |
|                      | Gradient(s)          | 2%-28%B                           | 2%-28%B                       | 2-24%B (fractions 06+25, 09+30, and 12+35); 4-24%B (fraction 15); 8-26%B (fractions 18 and 21) | 5-28%B          |
|                      | Flow Rate            | 500nl/min                         | 500nl/min                     | 500nl/min                                                                                      | 750nl/min       |
|                      | Gradient Length      | 110 min                           | 120 min                       | 90 min                                                                                         | 55 min          |
|                      | Wash                 | 10 min @ 90%B                     | 10 min @ 90%B                 | 10 min @ 90%B                                                                                  | 5 min @ 95%B    |
|                      | Instrument           | Fusion                            | Fusion                        | Fusion                                                                                         | LumosETD        |
|                      | Method               | SPS-MS3                           | MS2                           | MS2                                                                                            | MS2             |
| Spray Voltage        | 2200 V               | 2200 V                            | 2400 V                        | 2400 V                                                                                         |                 |
| Transfer Tube Temp   | 300 C                | 300 C                             | 325 C                         | 300 C                                                                                          |                 |
| S-Lens RF            | 60%                  | 60%                               | 65%                           | 50%                                                                                            |                 |
| MS1 Analyzer         | Orbitrap             | Orbitrap                          | Orbitrap                      | Orbitrap                                                                                       |                 |
| MS1 Resolution       | 120,000              | 120,000                           | 120,000                       | 120,000                                                                                        |                 |
| MS1 Scan Range       | 380-1500 m/z         | 300-1400 m/z                      | 300-1400 m/z                  | 300-1400 m/z                                                                                   |                 |
| MS1 Max Inj Time     | 500 ms               | 500 ms                            | 50 ms                         | 50 ms                                                                                          |                 |
| MS1 AGC Target       | 200,000              | 400,000                           | 500,000                       | 500,000                                                                                        |                 |
| MS2 Analyzer         | IonTrap              | IonTrap                           | IonTrap                       | IonTrap                                                                                        |                 |
| MS2 Top Method       | Speed, 3 sec         | Top20                             | Top20                         | Top30                                                                                          |                 |
| MS2 Dynamic Excl     | 70 sec               | 15 sec                            | 20 sec                        | 15 sec                                                                                         |                 |
| MS2 Charge States    | 2 to 7               | 2 to 6                            | 2 to 4                        | 2 to 6                                                                                         |                 |
| MS2 Isolation Window | 0.7 Da               | 2 Da                              | 3 Da                          | 2 Da                                                                                           |                 |
| MS2 Fragmentation    | CID                  | HCD                               | HCD                           | HCD                                                                                            |                 |
| MS2 Collision Energy | 35%                  | 35%                               | 35%                           | 32%                                                                                            |                 |
| MS2 Ion Trap Mode    | Turbo                | Rapid                             | Rapid                         | Rapid                                                                                          |                 |
| MS2 Max Inj Time     |                      | 30 ms                             | 50 ms                         | 35 ms                                                                                          |                 |
| MS2 AGC Target       |                      | 50,000                            | 10,000                        | 5,000                                                                                          |                 |
| MS3 Analyzer         | Orbitrap             |                                   |                               |                                                                                                |                 |
| MS3 Fragmentation    | HCD                  |                                   |                               |                                                                                                |                 |
| MS3 Collision Energy | 65%                  |                                   |                               |                                                                                                |                 |
| MS3 Resolution       | 30,000               |                                   |                               |                                                                                                |                 |
| MS3 Scan Range       | 120-500 m/z          |                                   |                               |                                                                                                |                 |
| MS3 AGC Target       | 100,000              |                                   |                               |                                                                                                |                 |
